# Supplementary material for: Expression of a pathogenic mutation of SOD1 sensitizes aprataxin-deficient cells and mice to oxidative stress and triggers hallmarks of premature ageing
Source: PubMed Central journal article supplement (PMC4291253; doi:10.1093/hmg/ddu500), 2014-09-30
Supplement: supp_ddu500_ddu500supp.pdf [file supp_ddu500_ddu500supp.pdf]

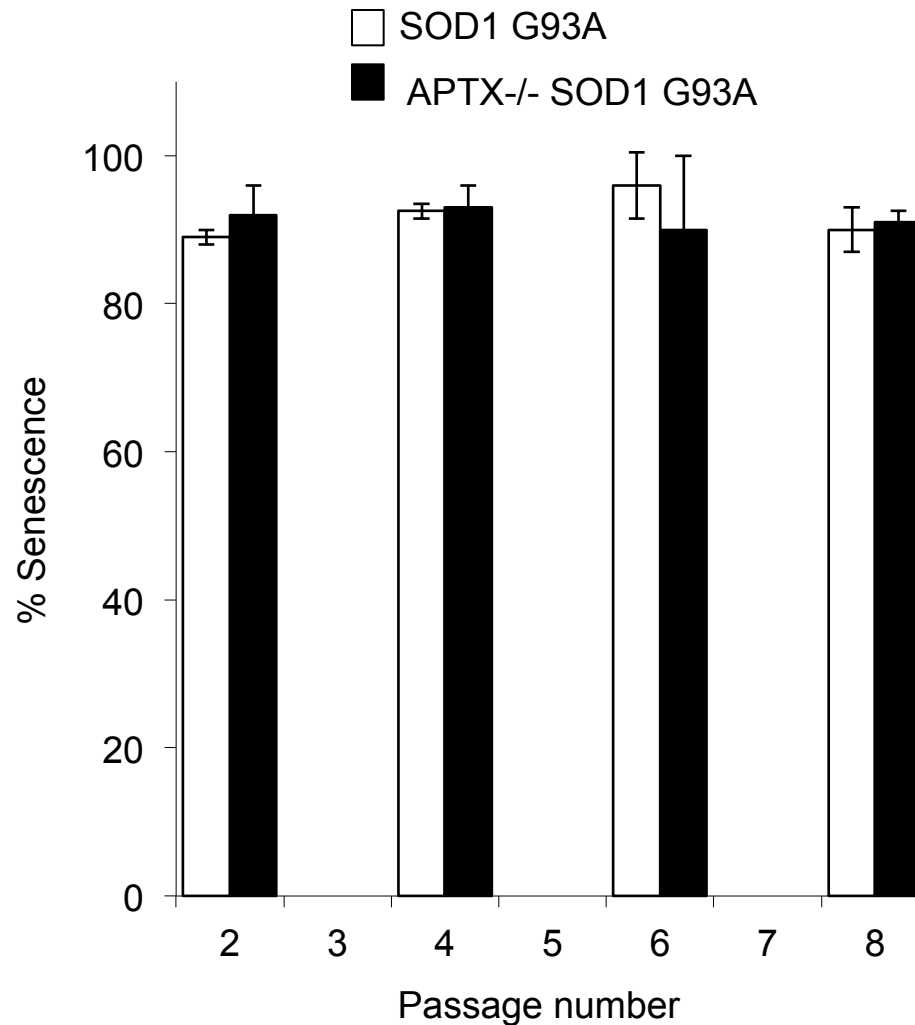

**Supplementary figure 1.** SOD1 G93A MEFs exhibit high senescence rate that is not affected by additional deletion of *Aptx*. Primary MEFs were examined for senescence-associated  $\beta$ -gal (SA- $\beta$ Gal) staining at the indicated passages and  $\beta$ -Gal positive cells were quantified and expressed as % of total cells.

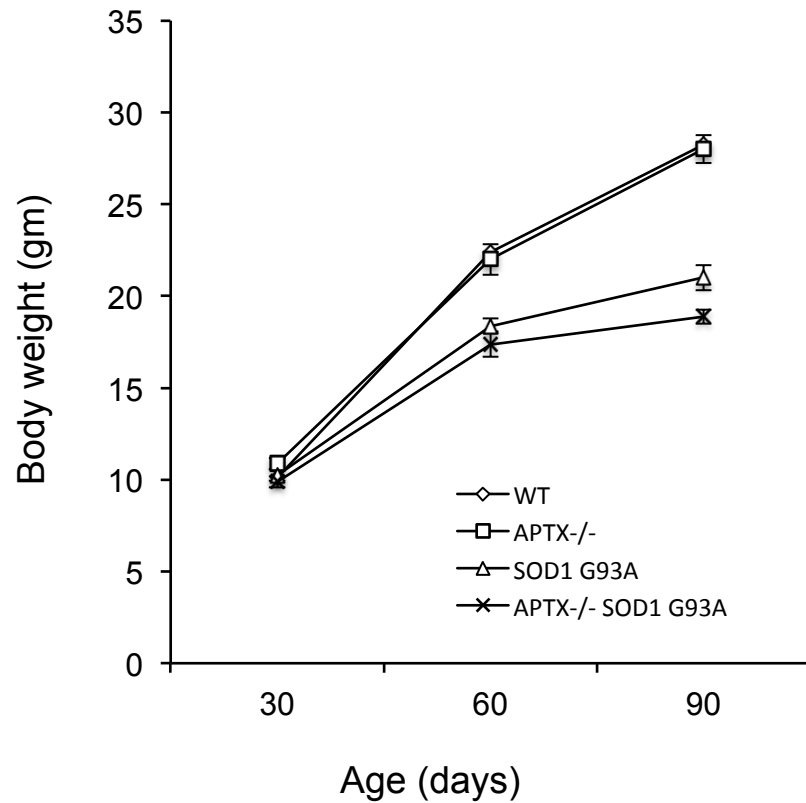

**Supplementary figure 2.** Body weight of littermate mice with the indicated genetic background (n=7).
